# Supplementary material for: Facile synthesis of hierarchical MCM-41 spheres with an ultrahigh surface area and their application for removal of methylene blue from aqueous solutions
Source: Royal Society of Chemistry journal article supplement (doi:10.1039/c3ay41593g), 2013-12-05
Supplement: c3ay41593g.pdf [file c3ay41593g.pdf]

# Facile synthesis of hierarchical MCM-41 spheres with ultrahigh surface area and its application for removal of methylene blue from wastewater

Qishu Qu,\* Zuli Gu

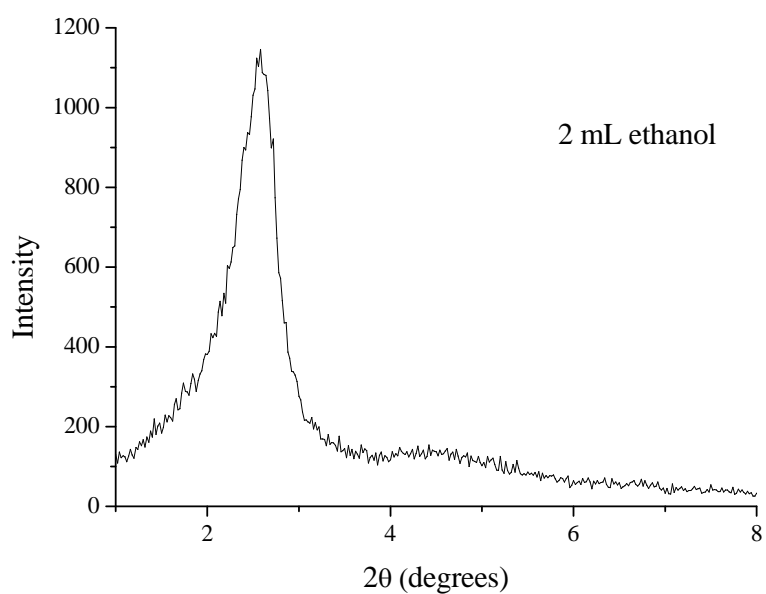

Figure S1. Small angle XRD patterns of mesoporous silica prepared using 2 mL ethanol in the initial mixture.

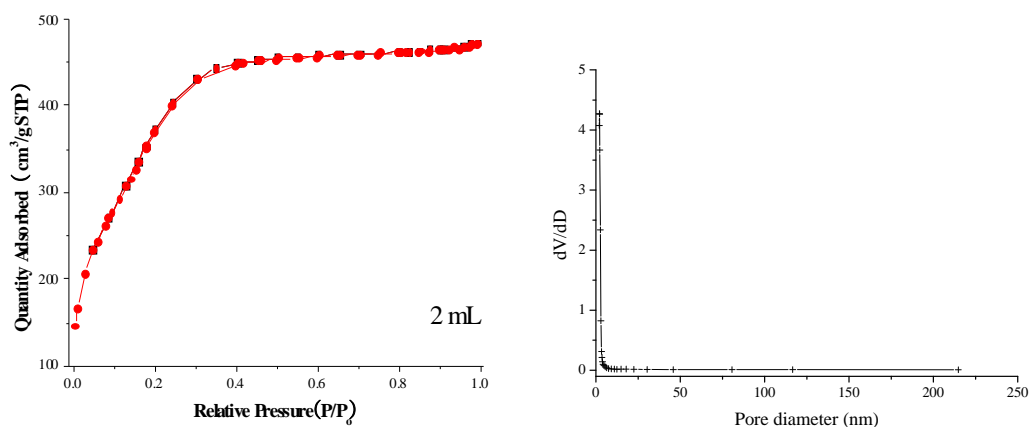

Figure S2. N<sub>2</sub> adsorption–desorption isotherms and pore distribution of mesoporous silica prepared using 2 mL ethanol in the initial mixture.

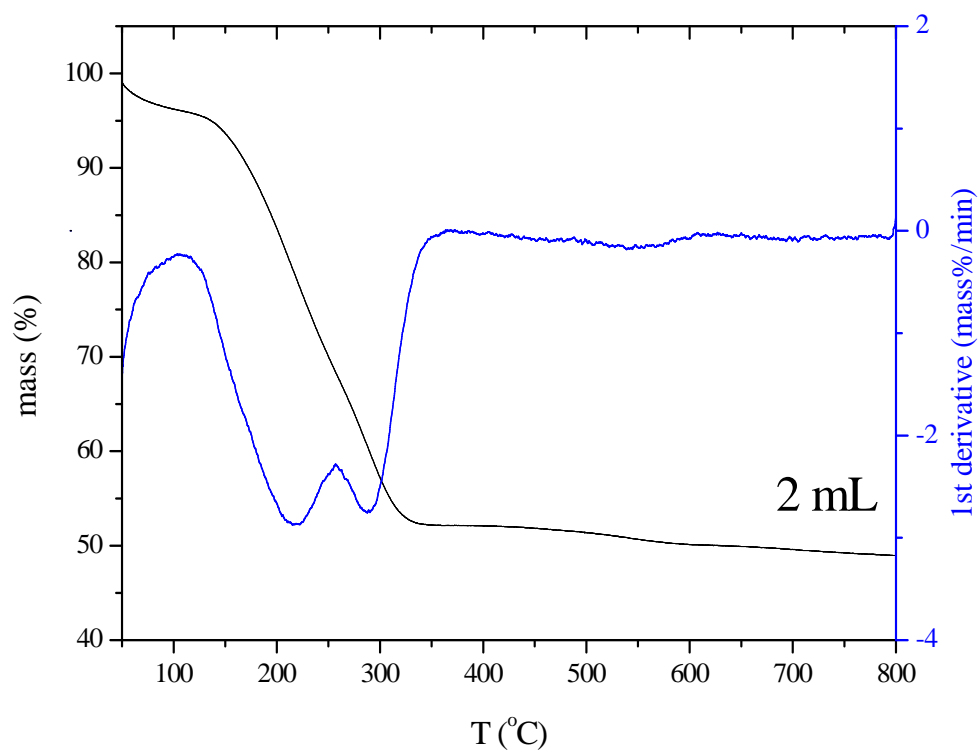

Figure S3. TG and DTG curves of mesoporous silica prepared using 2 mL ethanol in the initial mixture.

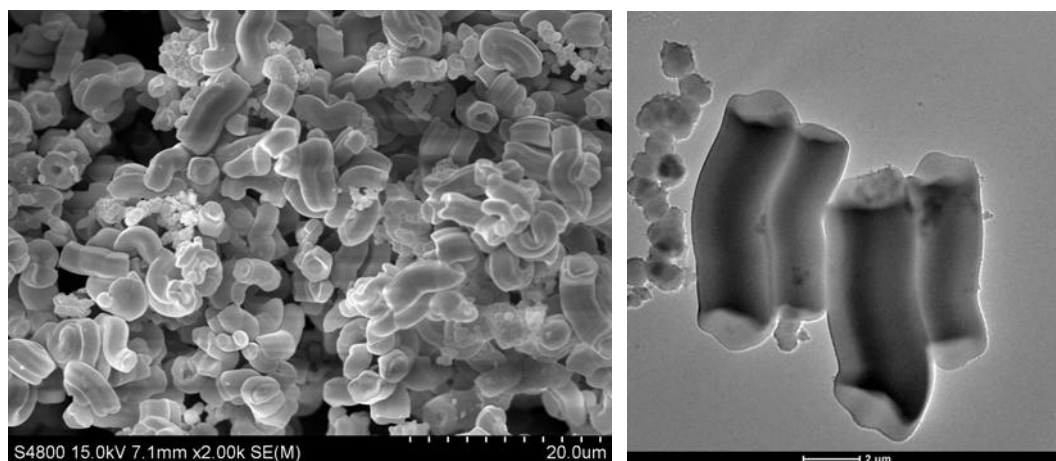

Figure S4. SEM and HRTEM images of mesoporous silica particles prepared using 2 mL ethanol in the reactant.
